# Supplementary material for: AF9 sustains glycolysis in colorectal cancer via H3K9ac‐mediated PCK2 and FBP1 transcription
Source: PubMed Central journal article supplement (PMC10413954; doi:10.1002/ctm2.1352), 2023-08-10

# Sup Figure 1

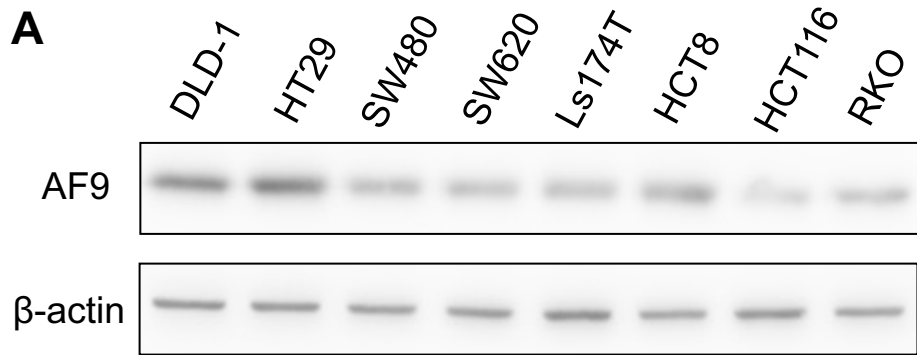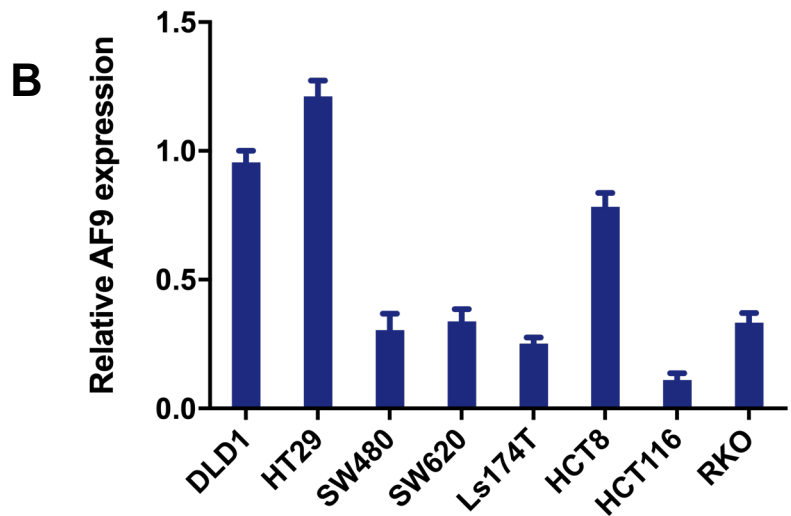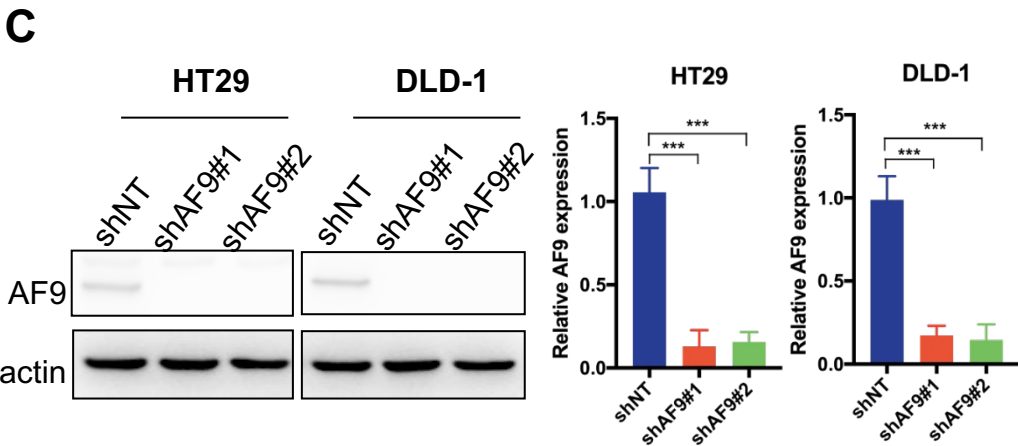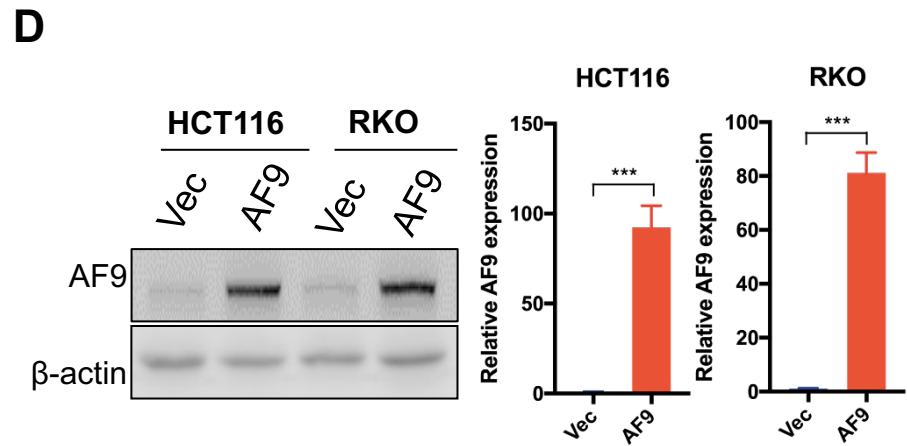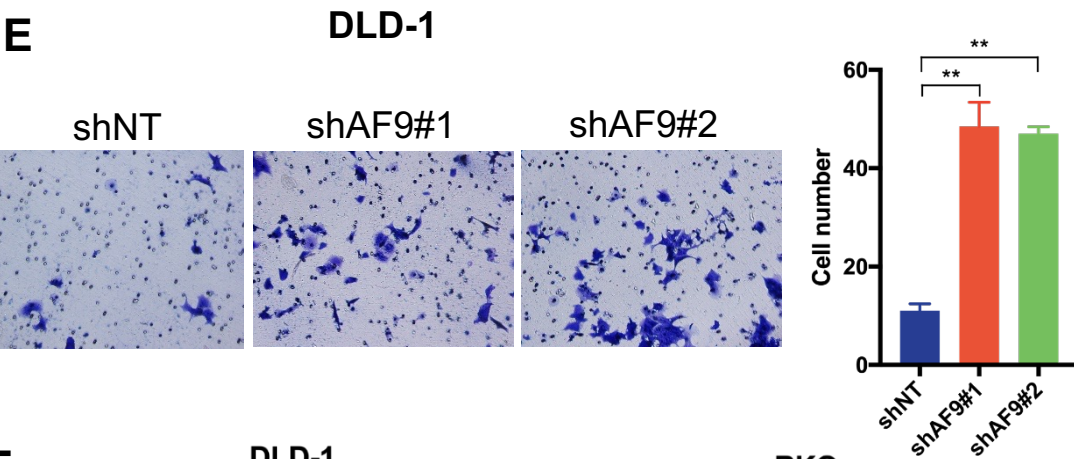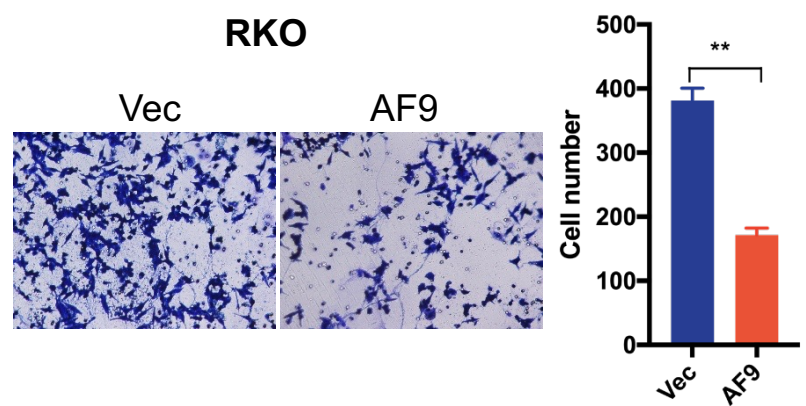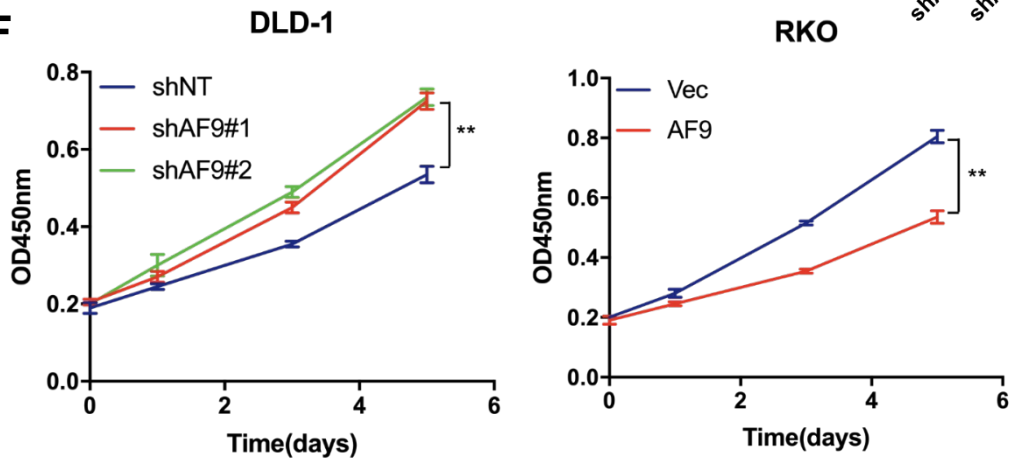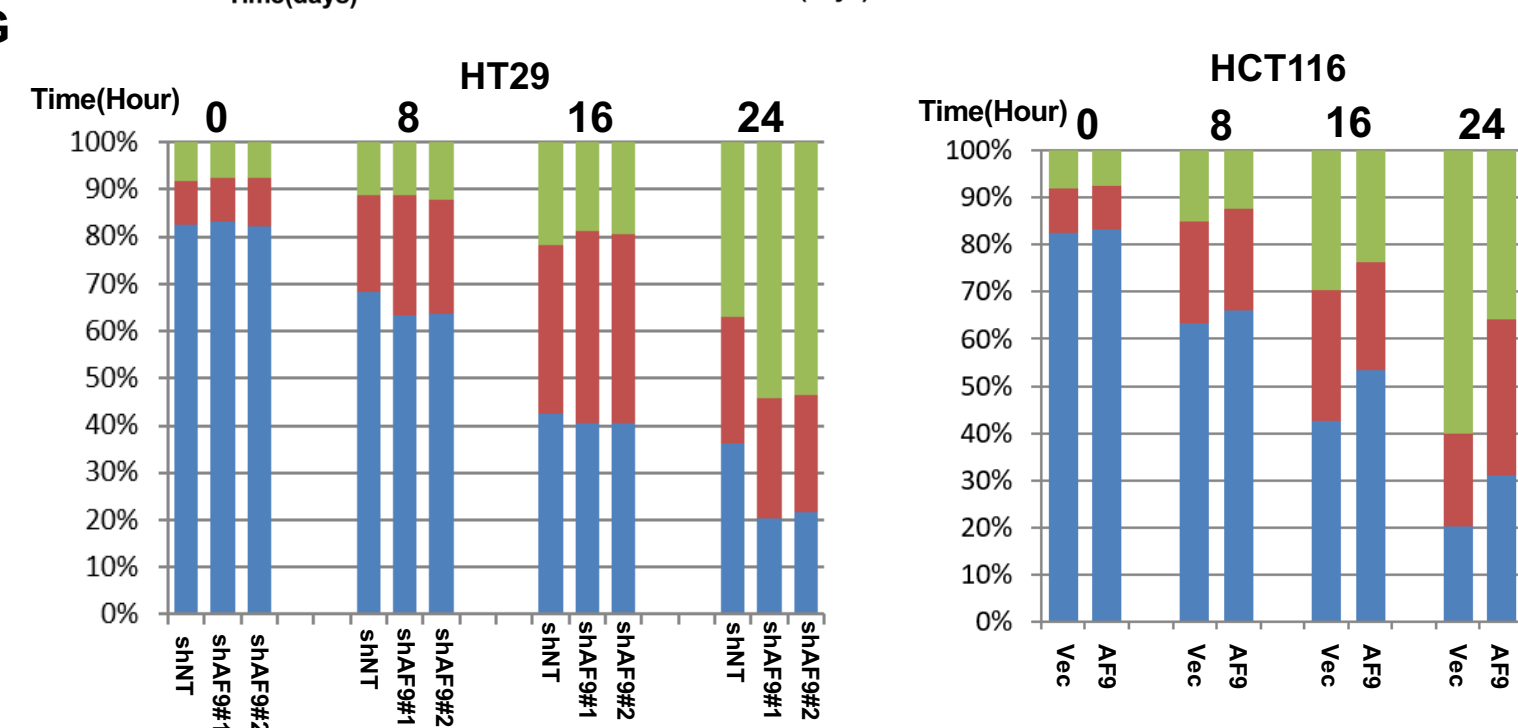

Supplement: CTM2-13-e1352-s005.pdf [file CTM2-13-e1352-s005.pdf]
